# Supplementary material for: Association of TIM-3 checkpoint receptor expression on T cells with treatment-free remission in chronic myeloid leukemia
Source: PubMed Central journal article supplement — Blood Adv. 2023 Jan 10;7(11):2364–74. doi: 10.1182/bloodadvances.2022008854 (PMC10220272; doi:10.1182/bloodadvances.2022008854), 2023-01-10
Supplement: BLOODA_ADV-2022-008854-mmc1.pdf [file BLOODA_ADV-2022-008854-mmc1.pdf]

Supplementary Table 1 – Antibodies for immunophenotyping

| Marker            | Clone      | Fluorochrome | Supplier       | Catalogue |
|-------------------|------------|--------------|----------------|-----------|
| <b>Checkpoint</b> |            |              |                |           |
| CD45              | HI30       | BUV496       | BD Biosciences | 750179    |
| CD366 (TIM-3)     | 7D3        | BUV737       | BD Biosciences | 748820    |
| CD3               | UCHT1      | BUV805       | BD Biosciences | 612895    |
| CD152 (CTLA-4)    | BNI3       | BV421        | BD Biosciences | 562743    |
| CD25              | M-A251     | BV480        | BD Biosciences | 566102    |
| CD4               | SK3        | BV650        | BD Biosciences | 563875    |
| TIGIT             | 741182     | BV711        | BD Biosciences | 747839    |
| CD279 (PD-1)      | EH12.1     | BB660-P      | BD Biosciences | 624295    |
| CD56              | B159       | BB790-P      | BD Biosciences | 624296    |
| FoxP3             | 236A/E7    | PE-CF594     | BD Biosciences | 563955    |
| CD127             | HIL-7R-M21 | PE-Cy7       | BD Biosciences | 560822    |
| CD223 (LAG3)      | T47-530    | APC-R700     | BD Biosciences | 565774    |
| CD8               | SK1        | APC-H7       | BD Biosciences | 560179    |

## Supplementary Table 2 – Gene expression datasets used for analysis of TIM-3 in CML LSCs and normal HSCs

| GEO accession number | Phenotype                  | Phases        | Condition | No. of CML patients vs Control                | Platform                           | Reference                    | PMID                                                             |
|----------------------|----------------------------|---------------|-----------|-----------------------------------------------|------------------------------------|------------------------------|------------------------------------------------------------------|
| GSE47927             | CD34+CD38-lin-CD45RA-CD90+ | CP, AP and BC | diagnosis | 12 vs 3                                       | Affymetrix Human Gene 1.0 ST Array | Cramer-Morales K et al, 2013 | <a href="https://pubmed.ncbi.nlm.nih.gov/23836560/">23836560</a> |
| GSE43754             | CD34+CD38-ALDH high        | CP            | diagnosis | 5 vs 5                                        | Affymetrix Human Exon 1.0 ST Array | Gerber JM et al, 2013        | <a href="https://pubmed.ncbi.nlm.nih.gov/23651669/">23651669</a> |
| GSE97562             | CD34+CD38-lin-             | CP            | diagnosis | 5 vs 5                                        | Affymetrix Human Gene 1.0 ST Array | Avilés-Vázquez Set al, 2017  | <a href="https://pubmed.ncbi.nlm.nih.gov/29030909/">29030909</a> |
| GSE76312             | Lin-CD34+ CD38-            | CP            | diagnosis | 18 (477 single cells) vs 6 (232 single cells) | scRNA-seq HiSeq2000 & 4000         | Giustacchini A et al 2017    | <a href="https://pubmed.ncbi.nlm.nih.gov/28504724/">28504724</a> |

### Reference

<sup>12</sup> Cramer-Morales, K. *et al.* Personalized synthetic lethality induced by targeting RAD52 in leukemias identified by gene mutation and expression profile. *Blood* **122**, 1293-1304 (2013).

<sup>13</sup> Gerber, J. M. *et al.* Genome-wide comparison of the transcriptomes of highly enriched normal and chronic myeloid leukemia stem and progenitor cell populations. *Oncotarget* **4**, 715-728 (2013).

<sup>14</sup> Aviles-Vazquez, S. *et al.* Global gene expression profiles of hematopoietic stem and progenitor cells from patients with chronic myeloid leukemia: the effect of in vitro culture with or without imatinib. *Cancer Med* **6**, 2942-2956 (2017).

<sup>15</sup> Giustacchini, A. *et al.* Single-cell transcriptomics uncovers distinct molecular signatures of stem cells in chronic myeloid leukemia. *Nature medicine* **23**, 692-702 (2017).

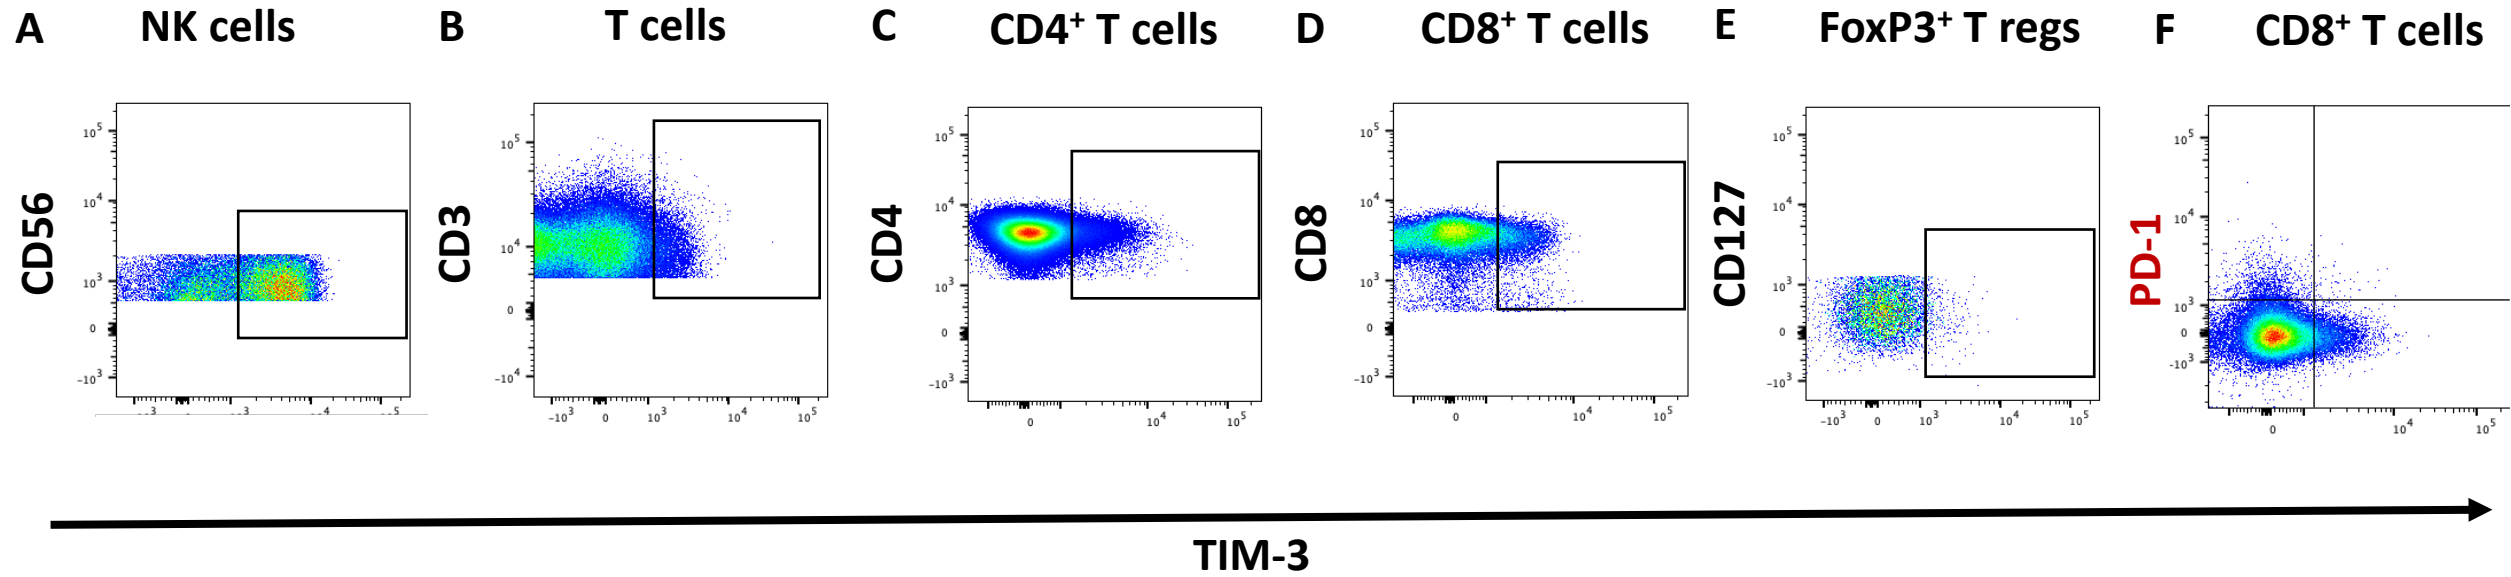

### Supplementary Figure 1. Representative gating for TIM-3

Lymphocytes were gated from the forward and side scatter characteristics. Single cells were gated from forward scatter height vs forward scatter area, and viable cells were then gated using the fixable viability stain FVS575V, this population was used for subsequent gating. Plots show representative TIM-3 expression in **(A)** NK cells (CD3<sup>-</sup> CD56<sup>dim</sup>), **(B)** CD3<sup>+</sup> T-cells, **(C)** CD4<sup>+</sup> T-cells, **(D)** CD8<sup>+</sup> T-cells and **(E)** regulatory T-cells (CD3<sup>+</sup> CD4<sup>+</sup> CD25<sup>+</sup> CD127<sup>-</sup> FoxP3<sup>+</sup>), **(F)** PD-1 and TIM-3 co-expression in CD8<sup>+</sup> T cells.

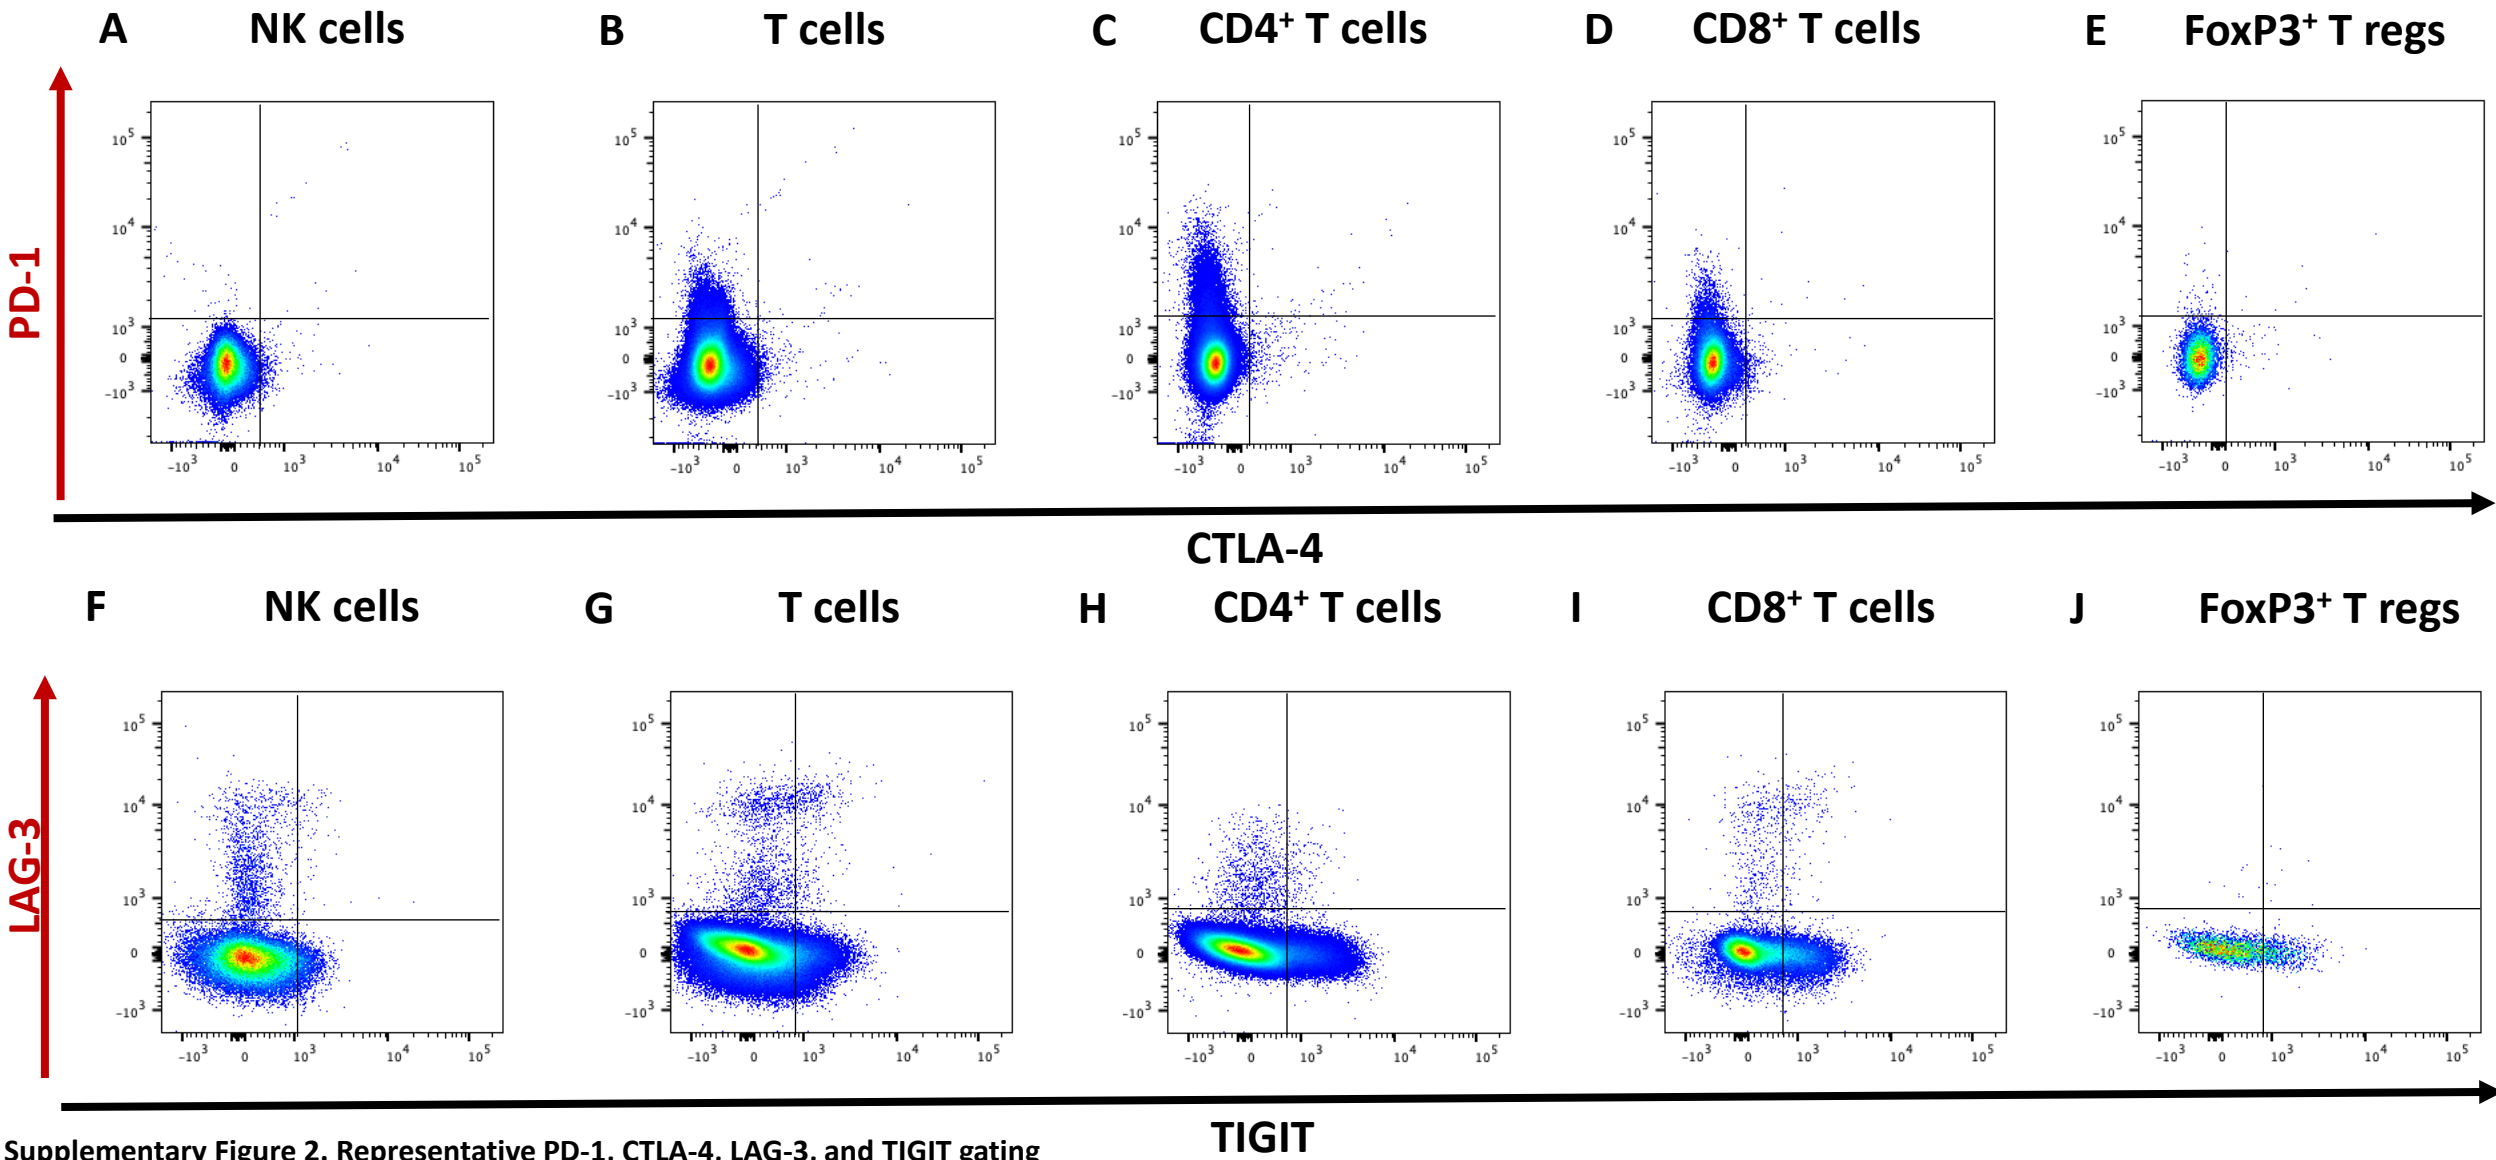

**Supplementary Figure 2. Representative PD-1, CTLA-4, LAG-3, and TIGIT gating**

Lymphocytes were gated from the forward and side scatter characteristics. Single cells were gated from forward scatter height vs forward scatter area, and viable cells were then gated using the fixable viability stain FVS575V, this population was used for subsequent gating. Plots show representative PD-1 (y-axis) and CTLA-4 (x-axis) expression in **(A)** NK cells (CD3<sup>-</sup> CD56<sup>dim</sup>), **(B)** CD3<sup>+</sup> T-cells, **(C)** CD4<sup>+</sup> T-cells, **(D)** CD8<sup>+</sup> T-cells and **(E)** regulatory T-cells (CD3<sup>+</sup> CD4<sup>+</sup> CD25<sup>+</sup> CD127<sup>-</sup> FoxP3<sup>+</sup>), and representative LAG-3 (y-axis) and TIGIT (x-axis) expression in **(F)** NK cells (CD3<sup>-</sup> CD56<sup>dim</sup>), **(G)** CD3<sup>+</sup> T-cells, **(H)** CD4<sup>+</sup> T-cells, **(I)** CD8<sup>+</sup> T-cells and **(J)** regulatory T-cells (CD3<sup>+</sup> CD4<sup>+</sup> CD25<sup>+</sup> CD127<sup>-</sup> FoxP3<sup>+</sup>).

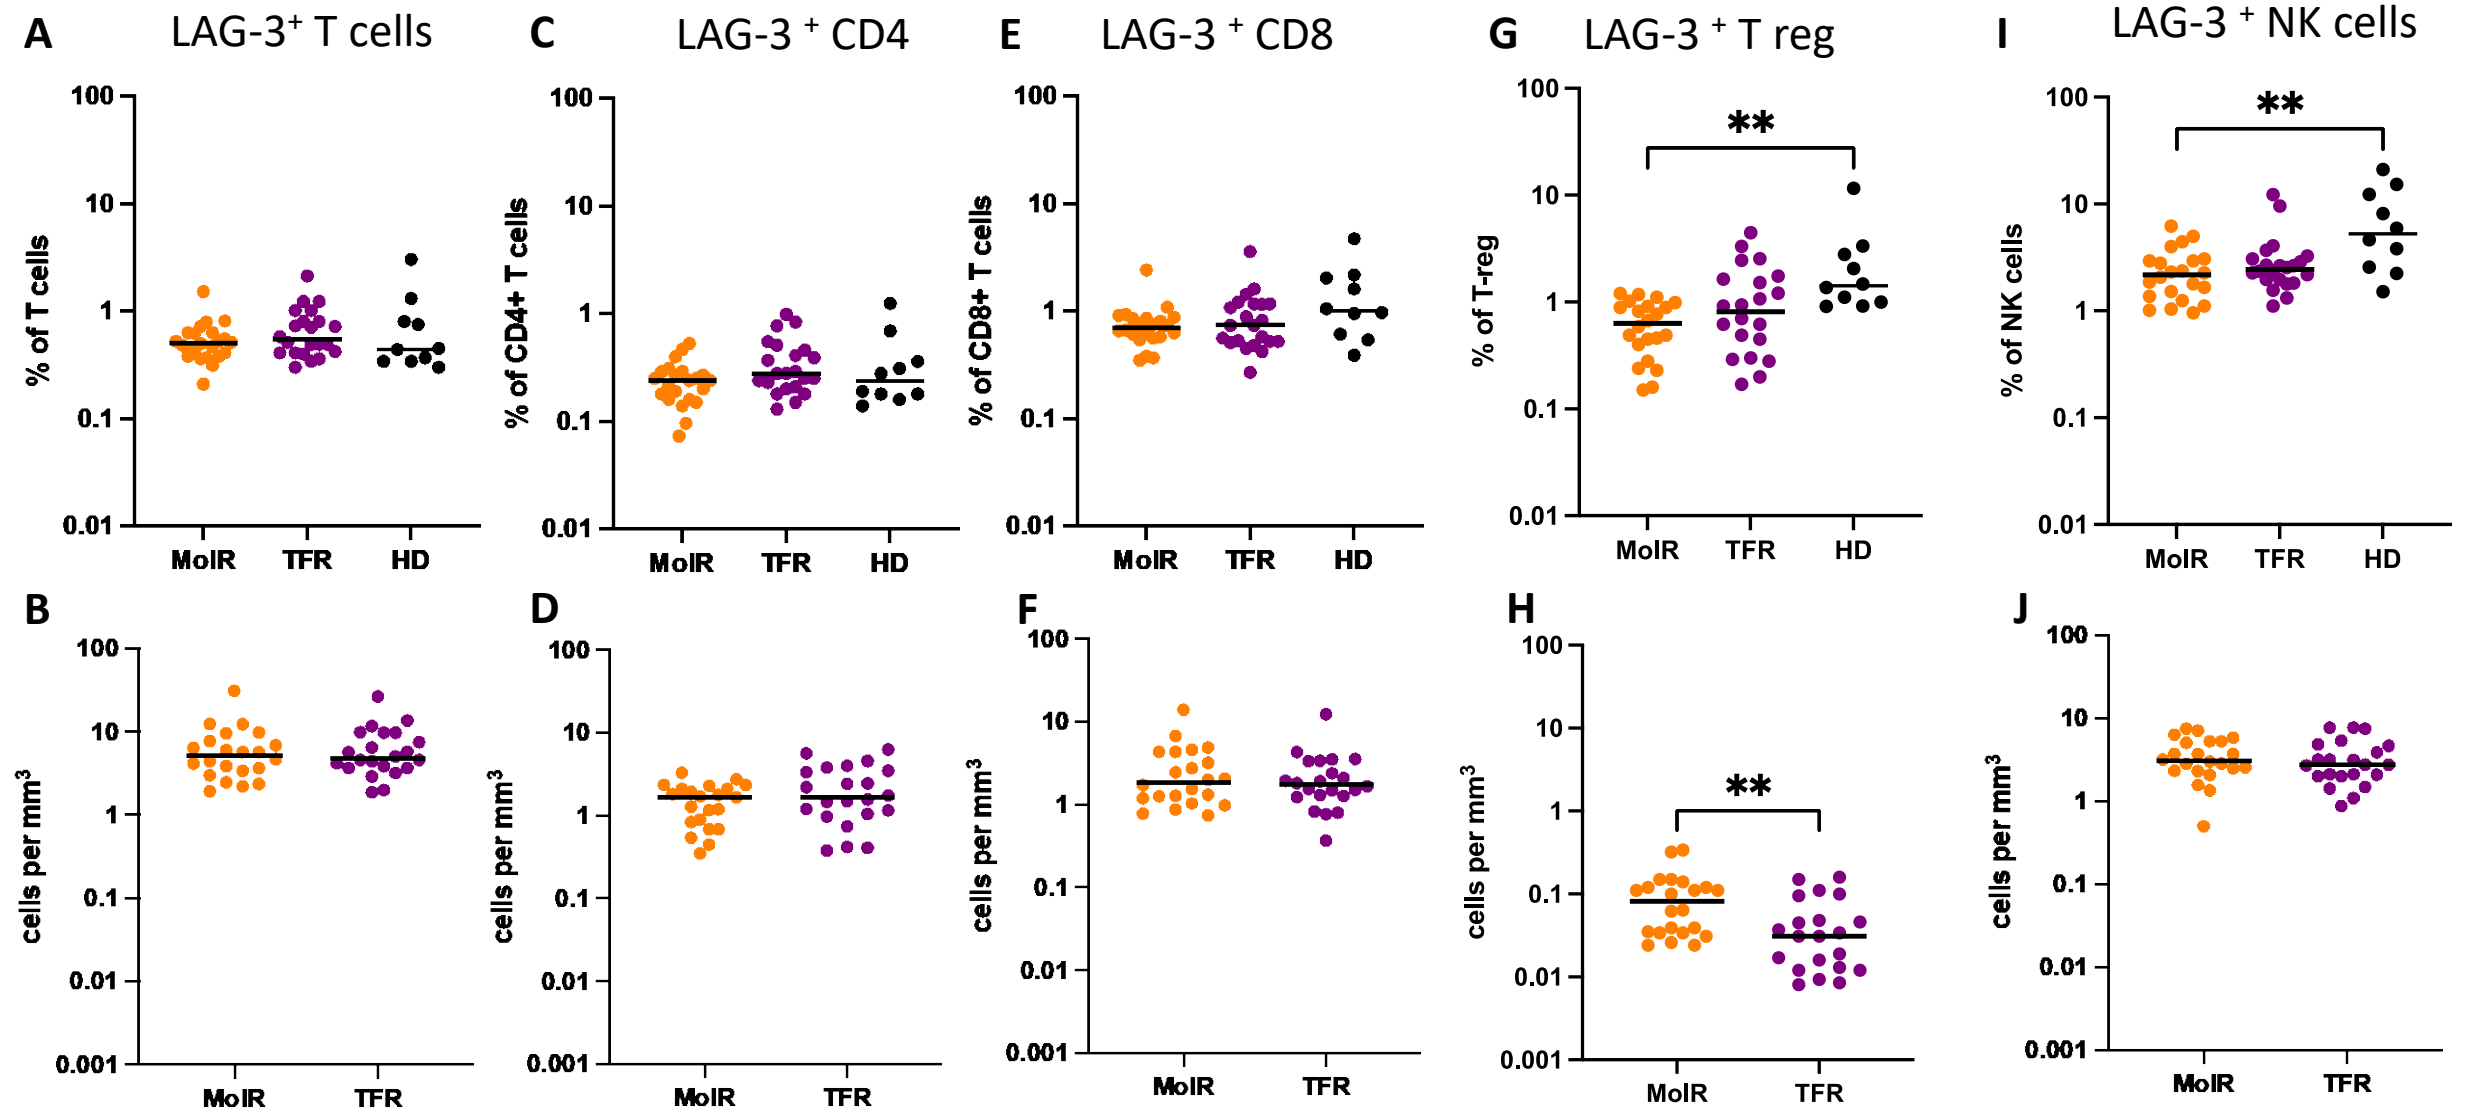

### Supplementary Figure 3. LAG-3 expression in MoIR and TFR patients at the time of TKI cessation

There was no statistically significant difference in LAG-3 expression between MoIR, TFR patients, or healthy donors (HD) (**A**) as a percentage of T cells or (**B**) absolute count of LAG-3<sup>+</sup> T cells, (**C**) percentage of CD4<sup>+</sup> T-cells or (**D**) absolute count of LAG-3<sup>+</sup> CD4<sup>+</sup> T-cells, (**E**) percentage of CD8<sup>+</sup> T-cells or (**F**) absolute count of LAG-3<sup>+</sup> CD8<sup>+</sup> T-cells. (**G**) LAG3<sup>+</sup> T-regs as a percentage of T-regs were significantly higher in HD compared with MoIR patients. (**H**) The absolute count of LAG-3<sup>+</sup> T-regs was significantly higher in the MoIR group compared with the TFR group, most likely due to significantly higher absolute counts of T-regs in this group. (**I**) LAG-3 expression as a percentage of NK cells was significantly higher in HD compared with MoIR patients and (**J**) absolute count of LAG-3<sup>+</sup> NK cells was not different between MoIR and TFR patients. The Kruskal-Wallis test was used to compare 3 groups and the Mann-Whitney U test was used to compare two groups, alpha was set at 0.05, \*\*p<0.01.

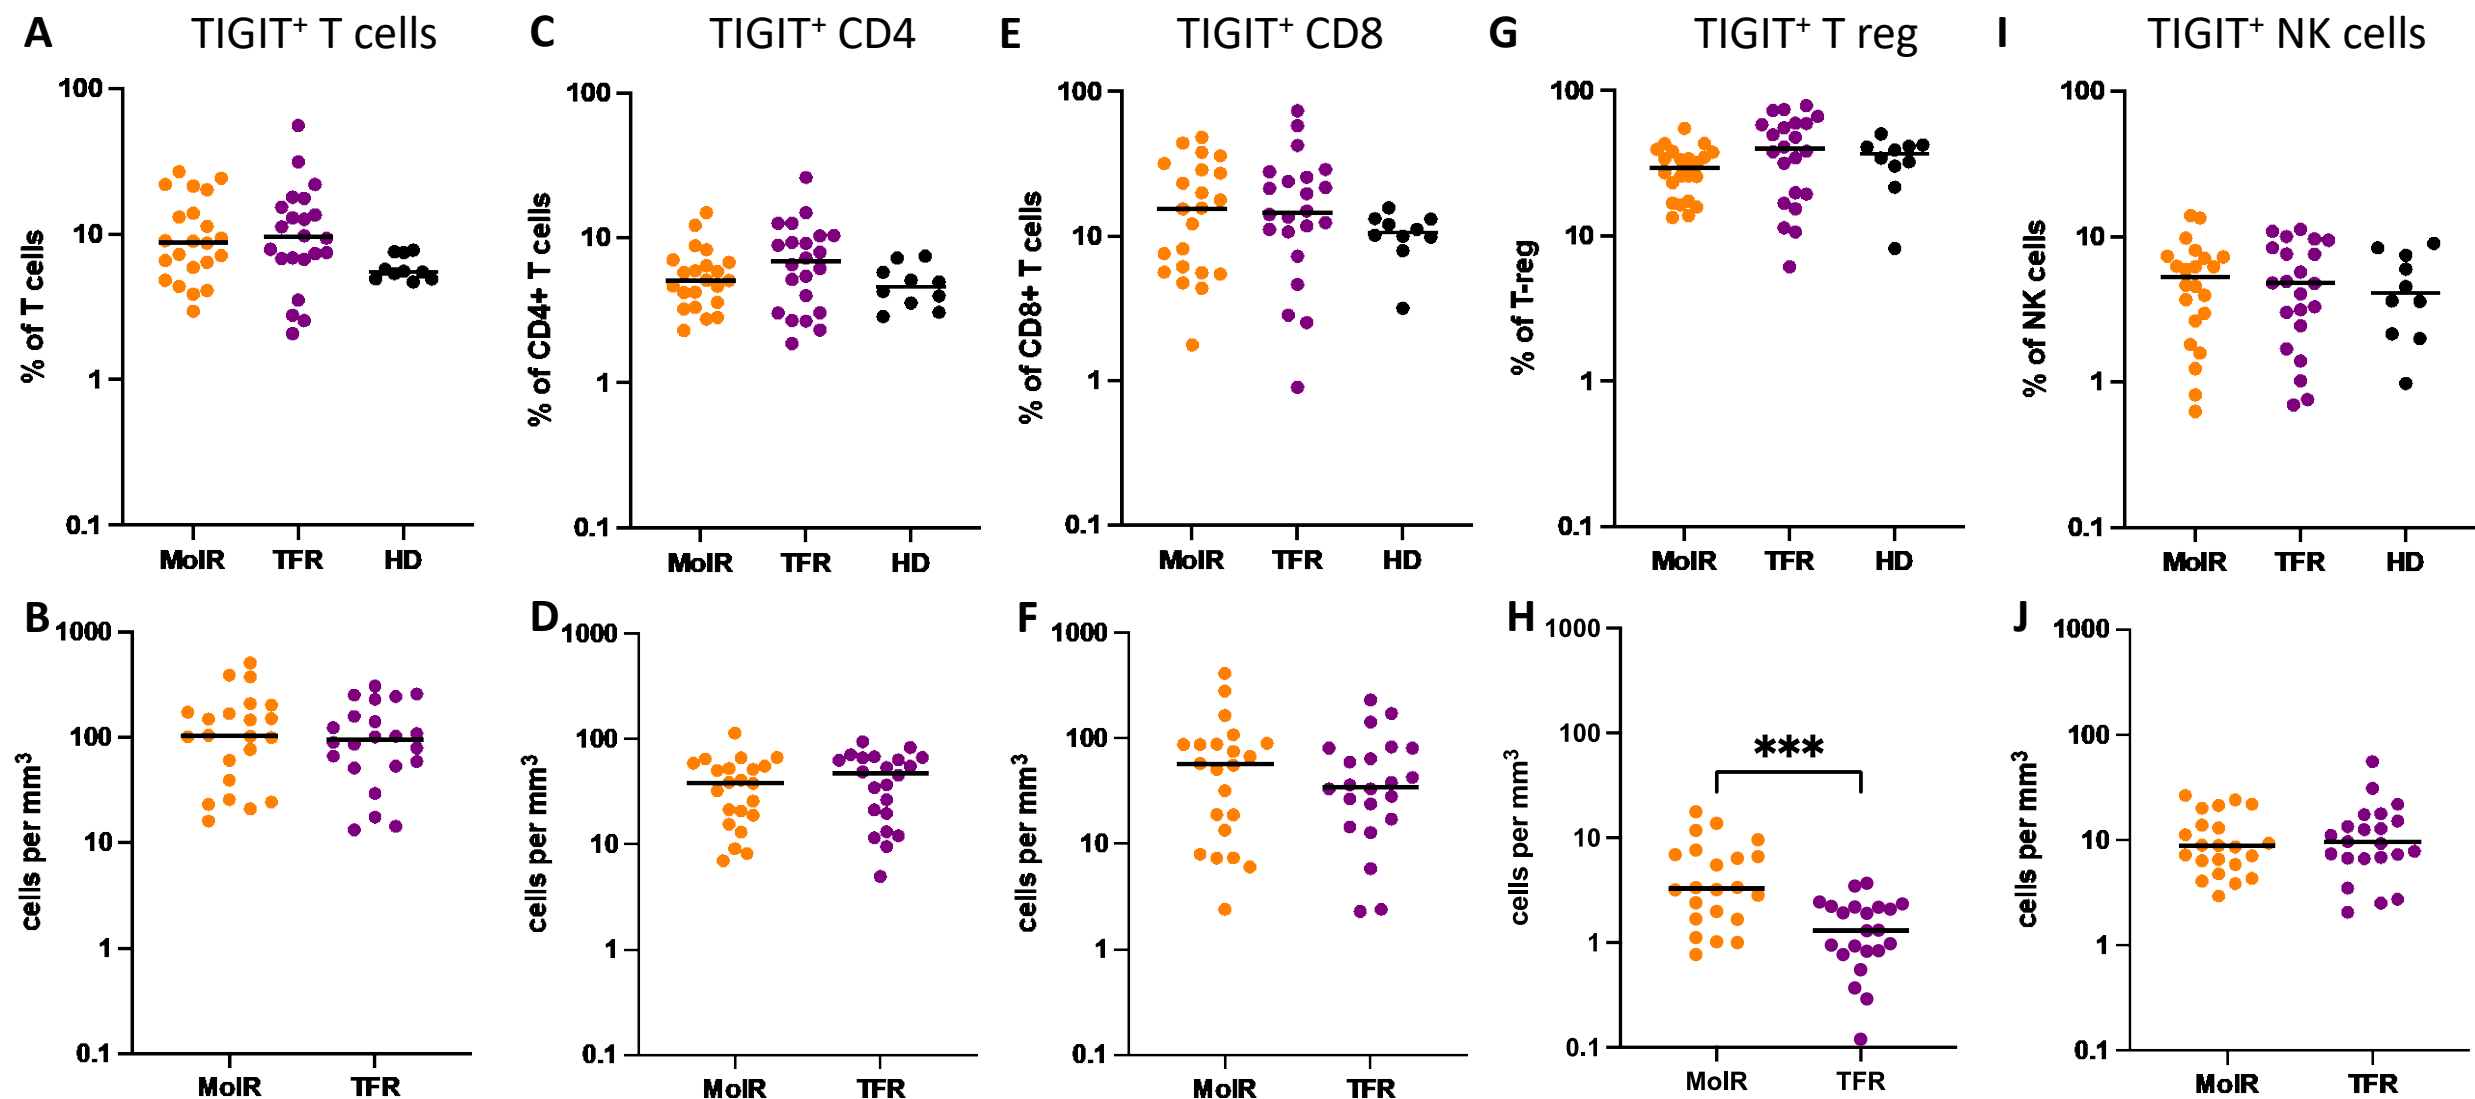

**Supplementary Figure 4. TIGIT expression in MoIR and TFR patients at the time of TKI cessation**

There was no statistically significant difference in TIGIT expression between MoIR, TFR patients, or healthy donors (HD) (**A**) as a percentage of T cells or (**B**) absolute count of TIGIT<sup>+</sup> T cells, (**C**) percentage of CD4<sup>+</sup> T-cells or (**D**) absolute count of TIGIT<sup>+</sup> CD4<sup>+</sup> T-cells, (**E**) percentage of CD8<sup>+</sup> T-cells or (**F**) absolute count of TIGIT<sup>+</sup> CD8<sup>+</sup> T-cells, (**G**) percentage of T-regs. (**H**) The absolute count of TIGIT<sup>+</sup> T-regs was significantly higher in the MoIR group compared with the TFR group, most likely due to significantly higher absolute counts of T-regs in this group. (**I**) TIGIT expression as a percentage of NK cells or (**J**) absolute count of TIGIT<sup>+</sup> NK cells was not different between MoIR and TFR patients. The Kruskal-Wallis test was used to compare 3 groups and the Mann-Whitney U test was used to compare two groups, alpha was set at 0.05, \*\*\*p<0.001.

**A**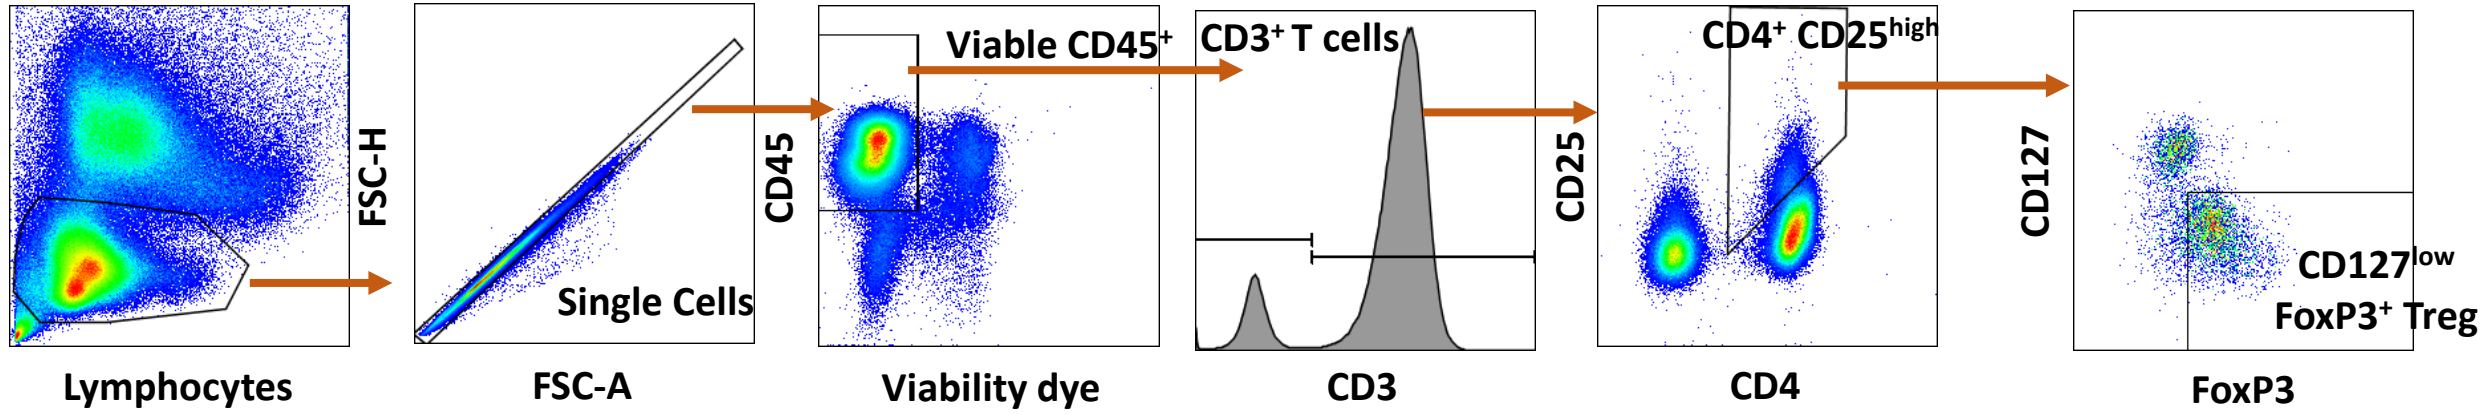**B**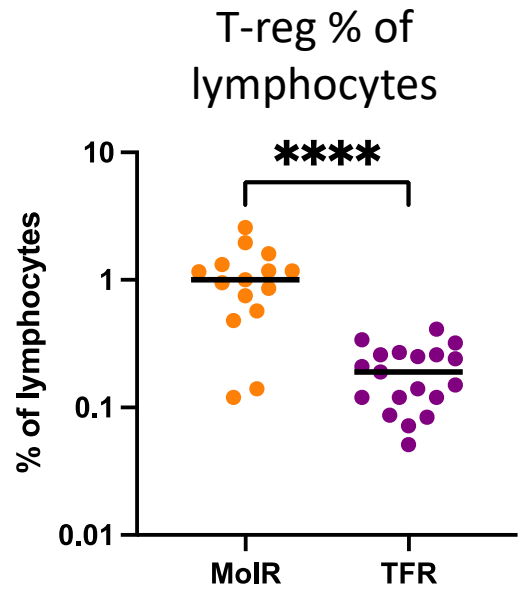**C**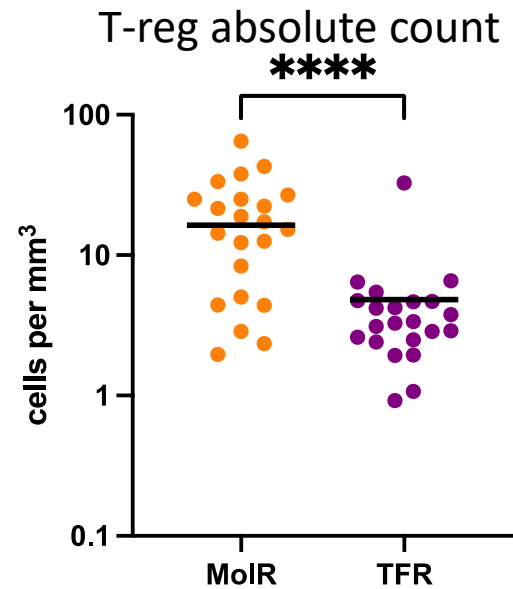

### Supplementary Figure 5. Representative gating of regulatory T-cells and association with relapse

(A) Representative gating of Tregs, lymphocytes were gated from the forward and side scatter characteristics. Single cells were gated from forward scatter height vs forward scatter area, and viable cells were then gated using the fixable viability dye FVS575V. CD3<sup>+</sup> T-cells were gated followed by CD4<sup>+</sup>CD25<sup>high</sup>. Finally, CD127<sup>neg/low</sup> and FoxP3<sup>+</sup> regulatory T-cells were gated. (B) Tregs were significantly increased in the moIR group both as a percentage of lymphocytes as well as absolute counts. The Mann-Whitney U test was used to compare group, alpha was set at 0.05, \*\*\*\*p<0.0001
